# Supplementary material
Source: PubMed Central journal article supplement (PMC7507224)

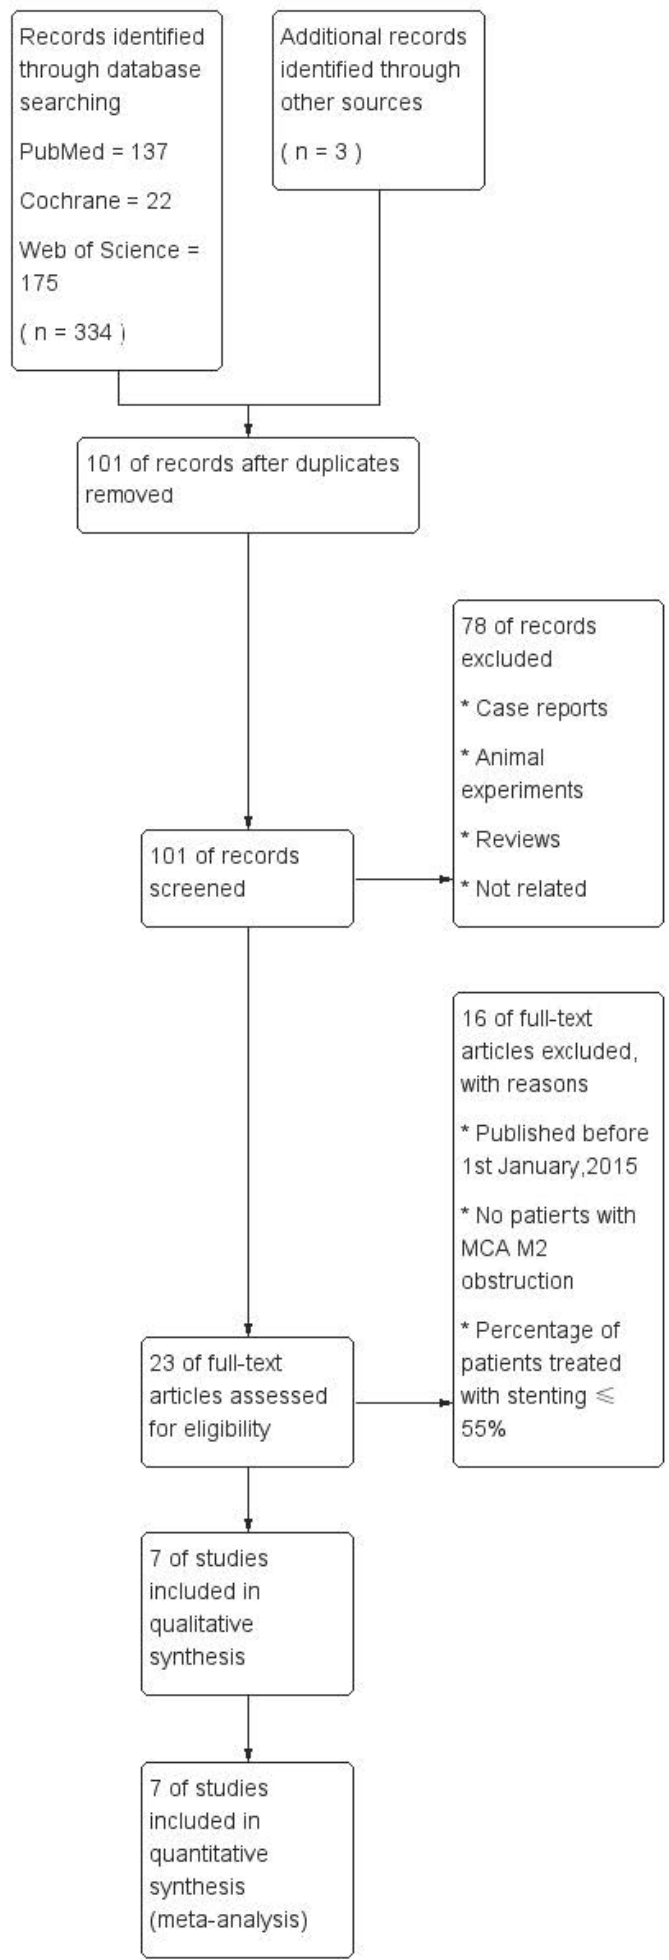

Supplement: INE886405_Supplemetal_Material1.pdf [file INE886405_Supplemetal_Material1.pdf]

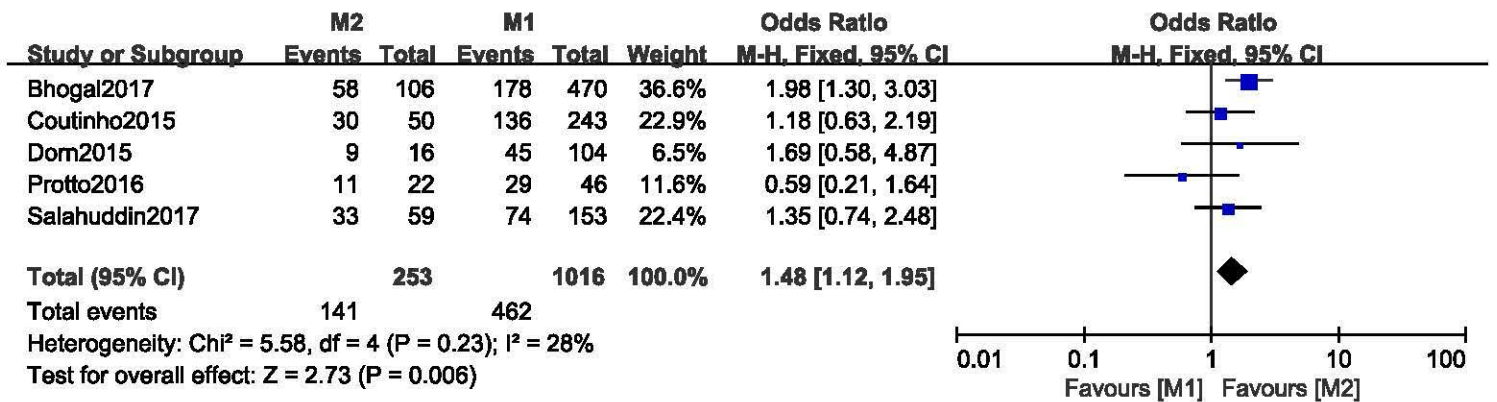

Supplement: INE886405_Supplemetal_Material2.pdf [file INE886405_Supplemetal_Material2.pdf]

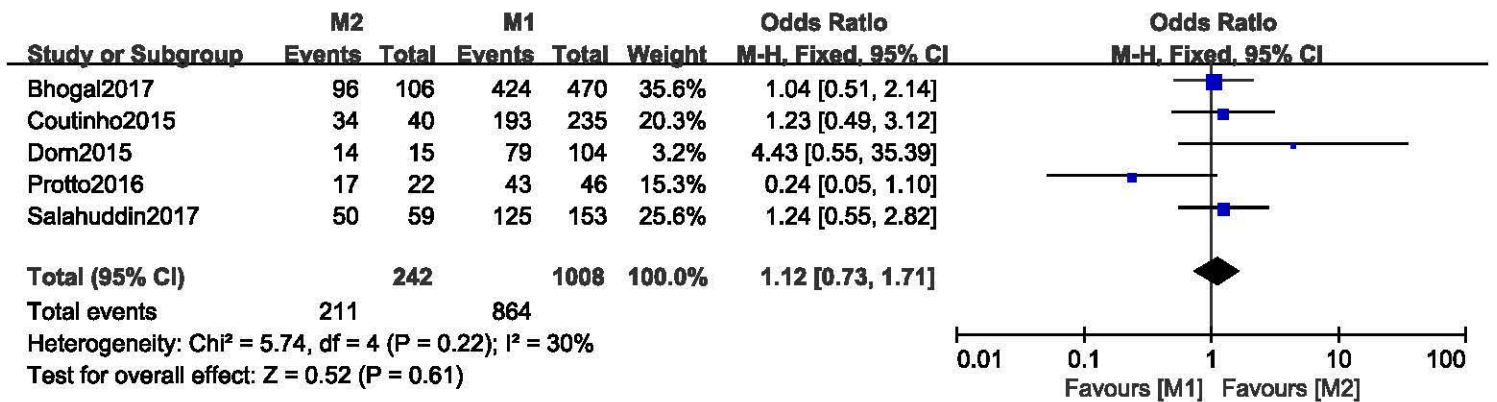

Supplement: INE886405_Supplemetal_Material3.pdf [file INE886405_Supplemetal_Material3.pdf]

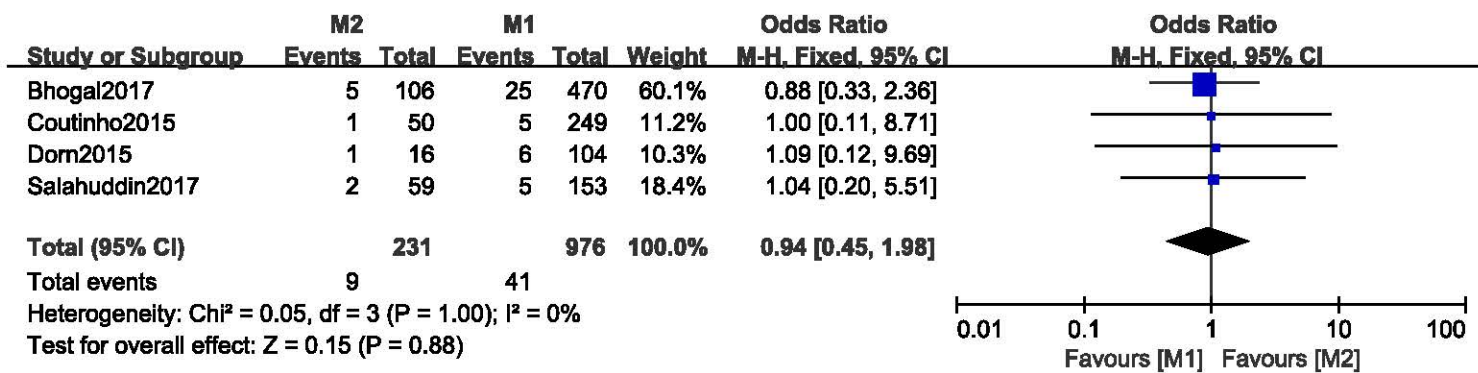

Supplement: INE886405_Supplemetal_Material4.pdf [file INE886405_Supplemetal_Material4.pdf]

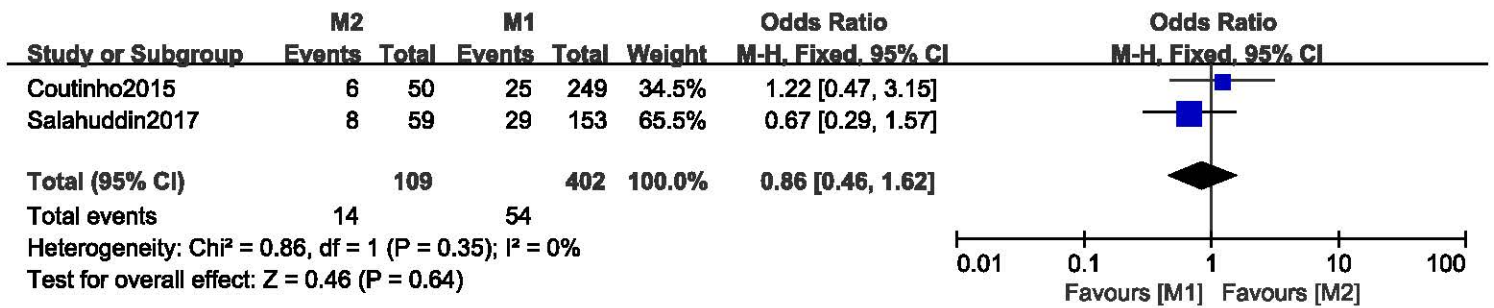

Supplement: INE886405_Supplemetal_Material5.pdf [file INE886405_Supplemetal_Material5.pdf]

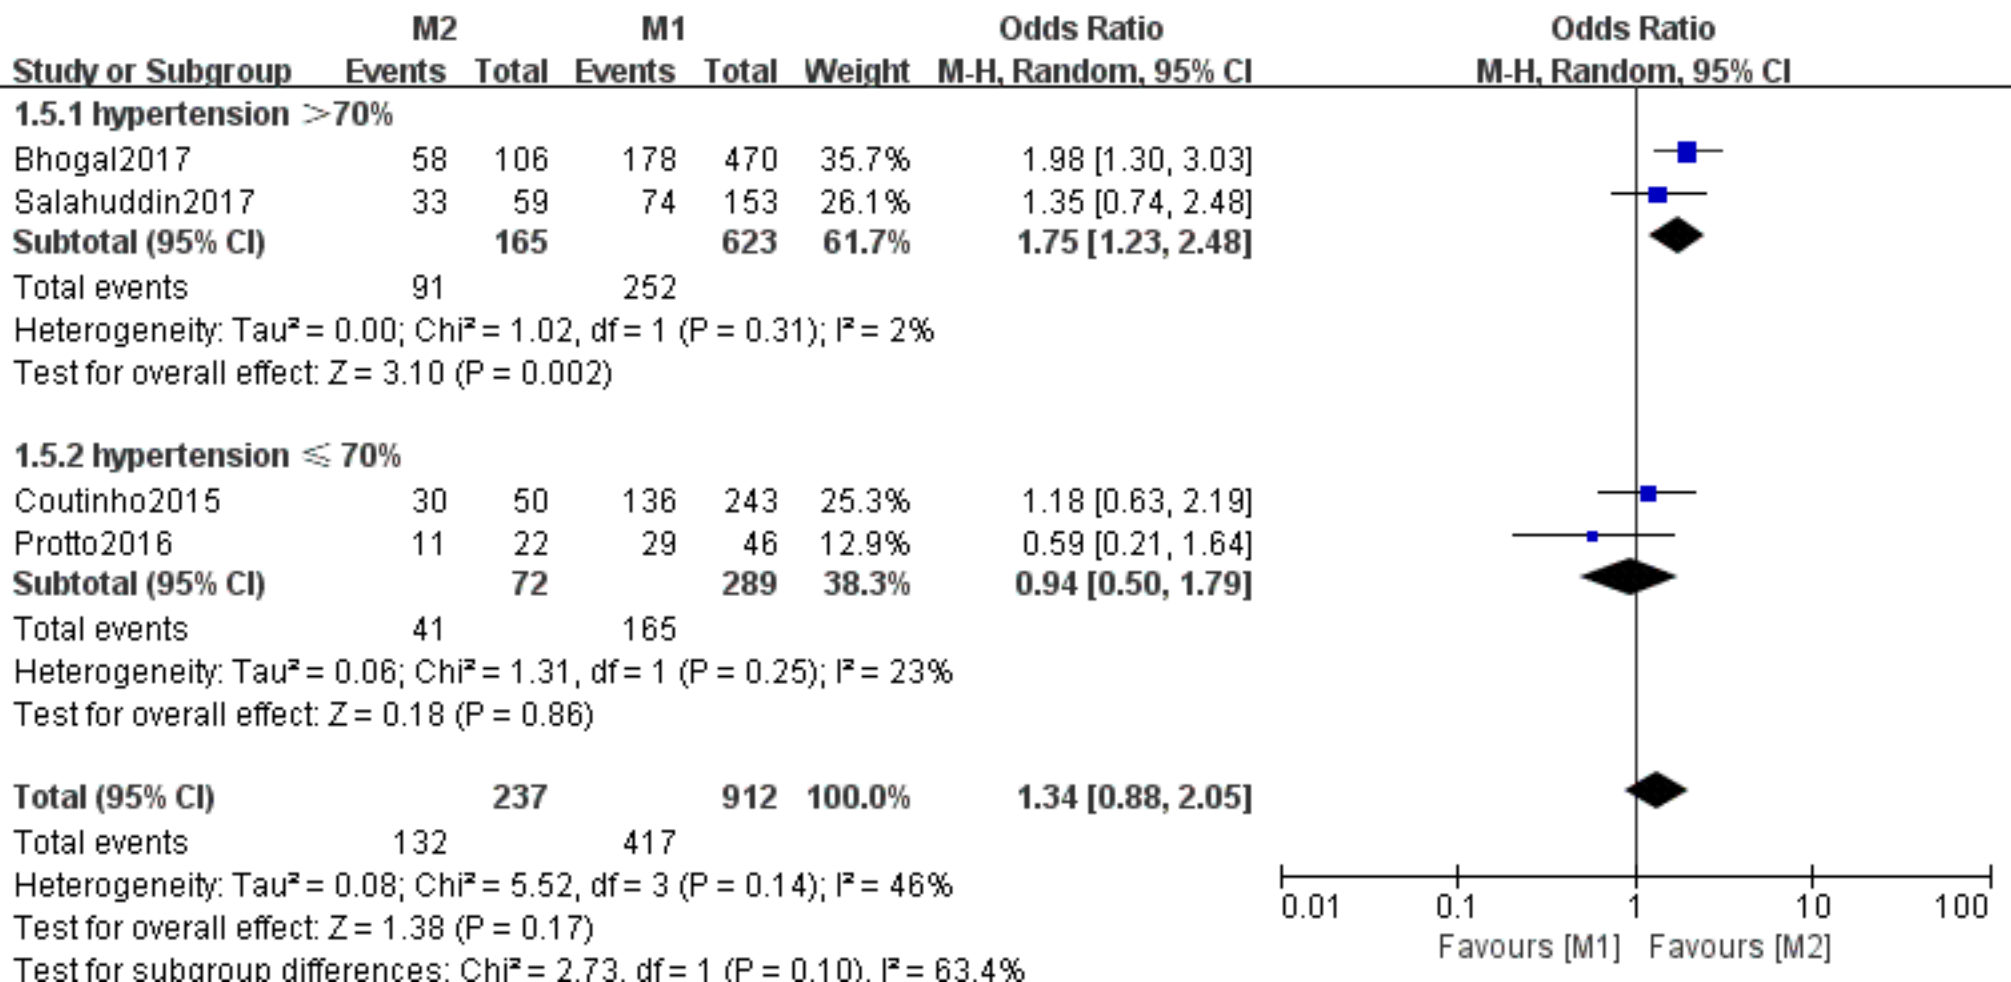

Supplement: INE886405_Supplemetal_Material6.pdf [file INE886405_Supplemetal_Material6.pdf]

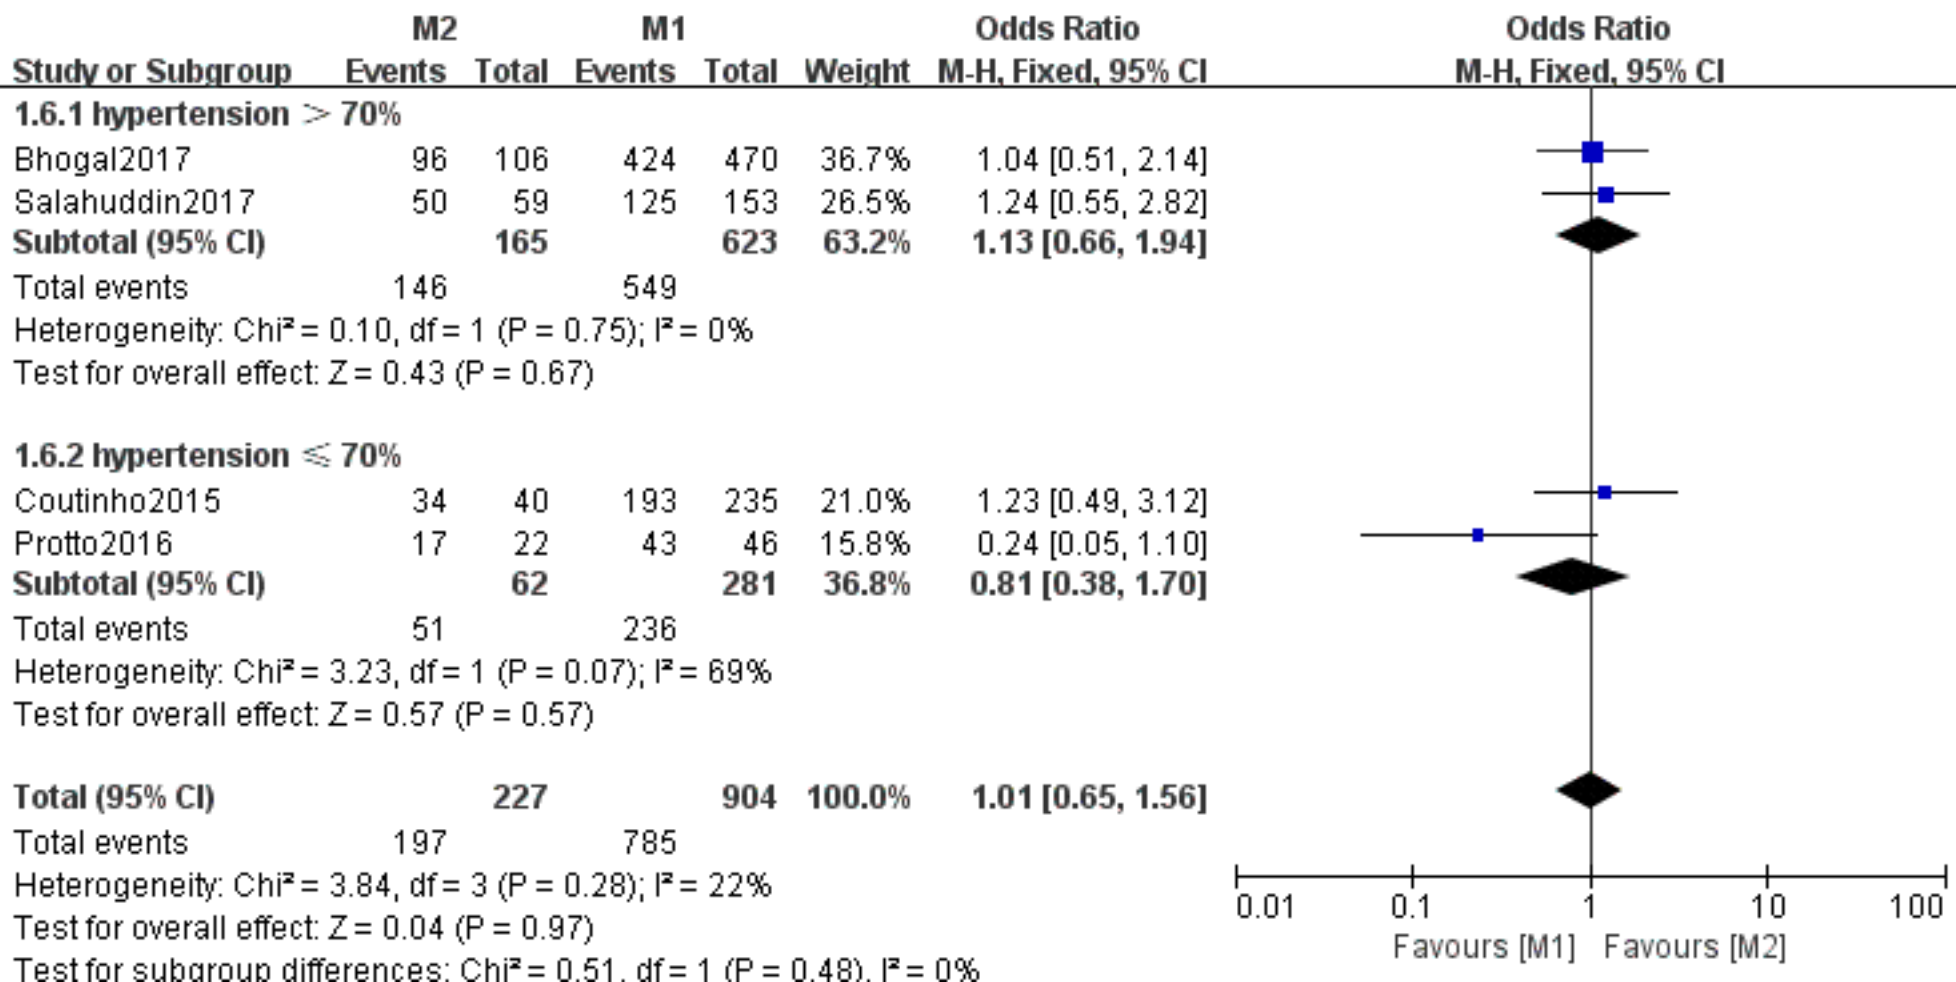

Supplement: INE886405_Supplemetal_Material7.pdf [file INE886405_Supplemetal_Material7.pdf]
